# Supplementary material for: Quantification of Ectopic Fat Fractions in Type 2 Diabetes Mellitus using MR-Dixon Technique
Source: Research Square preprint supplement (doi:10.21203/rs.3.rs-5656230/v1), 2025-05-06
Supplement: Supplementary file 1 [file 43a543c19618650f1fd1860c.docx]

**Table (4):** Correlation between T2DM and Body Composition Parameters.

| **Variable** | **OR (95% CI)** | **P-value** |
| --- | --- | --- |
| **BMI** | 0.971 (0.710–1.329) | 0.856 |
| **PFF** | 2.201 (1.012–4.788) | **0.047*** |
| **HFF** | 0.870 (0.567–1.336) | 0.525 |
| **VFI** | 0.229 (0.000–15,627,112.075) | 0.873 |

VFI visceral fat index; FF, fat fraction; HFF, hepatic fat fraction; PFF, pancreatic fat fraction; and BMI, body mass index; OR, odds ratio; CI, confidence interval. The bold values indicate statistically significant.
