# Supplementary material for: Quantification of Ectopic Fat Fractions in Type 2 Diabetes Mellitus using MR-Dixon Technique
Source: Research Square preprint supplement (doi:10.21203/rs.3.rs-5656230/v1), 2025-05-06
Supplement: Supplementary file 2 [file 83171fef3f7e957f6ac02c5e.docx]

**Table (5):** Area under the Curve (AUC) for Body Composition Parameters.

| **Variable** | **AUC (95% CI)** | **P- Value** | **Cutoff Point** | **Sensitivity (%)** | **Specificity (%)** |
| --- | --- | --- | --- | --- | --- |
| **BMI** | 0.653 (0.454 – 0.852) | 0.152 | 28.5400 | 66.7 | 66.7 |
| **PFF** | 0.960 (0.881 – 1.000) | **0.000** | 6.350 | 93 | 93 |
| **HFF** | 0.744 (0.564 – 0.925) | **0.023** | 5.3 | 6 | 80 |
| **VFI** | 0.867 (0.724 – 1.00) | **0.001** | 0.31 | 80 | 93.3 |

BMI, body mass index; SAT, subcutaneous adipose tissue; FF, fat fraction; VFI, visceral fat index; HFF, hepatic fat fraction; PFF, pancreatic fat fraction.
