# Supplementary material for: Quantification of Ectopic Fat Fractions in Type 2 Diabetes Mellitus using MR-Dixon Technique
Source: Research Square preprint supplement (doi:10.21203/rs.3.rs-5656230/v1), 2025-05-06
Supplement: Supplementary file 3 [file 8d4c930ff8e471dc6145cfd3.docx]

|  | **TR** | **TE** | **Slice thickness** | **Matrix** | **FOV** |
| --- | --- | --- | --- | --- | --- |
| **T2 single-shot fast spin-echo** | 412 ms | TE:92 ms | 3 mm | 384X288 | 384X288 |
| **T2* gradient-echo** | 12.4 ms | TE 23 ms | 3 mm | 160 × 160 | 39 cm |
| **m-Dixon (axial)** | 6.46 ms | TE1/TE2 2.39/4.77 ms | 3 mm | 1.3×1.3mm | 380×380mm |

**Table (1): Acquisition parameters of the MRI protocol**
