# Supplementary material for: Quantification of Ectopic Fat Fractions in Type 2 Diabetes Mellitus using MR-Dixon Technique
Source: Research Square preprint supplement (doi:10.21203/rs.3.rs-5656230/v1), 2025-05-06
Supplement: Supplementary file 4 [file 8ec85c6e04d7022f53895784.docx]

**Table (**3**):** Comparison of Body Composition and Biochemical Parameters between Diabetic (DM) and Non-Diabetic (NDM) Groups.

| **Parameter** | **DM (Mean ± SD)** | **NDM (Mean ± SD)** | **p-value** |
| --- | --- | --- | --- |
| **Age** | 51.60 ± 12.12 | 28.93 ± 3.04 | **0.000*** |
| **BMI** | 29.65 ± 5.07 | 26.69 ± 5.72 | 0.145 |
| **HBA1C** | 8.16 ± 1.83 | 5.37 ± 0.17 | **0.000*** |
| **HDL** | 50.41 ± 26.28 | 40.86 ± 13.89 | 0.224 |
| **LDL** | 92.56 ± 35.99 | 111.20 ± 30.37 | 0.136 |
| **TG** | 158.93 ± 102.41 | 106.93 ± 54.99 | 0.094 |
| **CHOL** | 171.47 ± 55.87 | 178.93 ± 30.73 | 0.654 |
| **VLDL** | 35.56 ± 24.19 | 24.00 ± 14.42 | 0.147 |
| **TG/HDL** | 3.91 ± 3.57 | 3.07 ± 2.18 | 0.443 |
| **Body Composition** | | | |
| **PFF** | 11.74 ± 3.46 | 3.61 ± 2.60 | **0.000*** |
| **SAT Fat Fraction** | 93.27 ± 1.55 | 88.43 ± 2.91 | **0.000*** |
| **VFI** | 0.40 ± 0.12 | 0.23 ± 0.06 | **0.000*** |
| **HFF** | 8.51 ± 7.20 | 4.47 ± 3.72 | 0.064 |
| **PS FF** | 4.77 ± 2.03 | 2.38 ± 0.96 | **0.000*** |
| **BMAT FF** | 48.97 ± 6.86 | 32.75 ± 11.01 | **0.000*** |

BMI, body mass index; TG, triglycerides; TC, total cholesterol; HDL-C, high-density lipoprotein cholesterol; LDL-C, low-density lipoprotein cholesterol; SAT, subcutaneous adipose tissue; FF, fat fraction; VFI, visceral fat index; HFF, hepatic fat fraction; PFF, pancreatic fat fraction: PS psoas muscle; and BMAT, bone marrow adipose tissue. Data were expressed as mean ± SD, median; P-value shows comparison of the DM and NDM groups.
