# Supplementary material for: Quantification of Ectopic Fat Fractions in Type 2 Diabetes Mellitus using MR-Dixon Technique
Source: Research Square preprint supplement (doi:10.21203/rs.3.rs-5656230/v1), 2025-05-06
Supplement: Supplementary file 5 [file 986030daf4c530503403cce6.docx]

**Table (6):** Correlation Between Glycemic Control and Body Fat Composition Parameters and DM Disease Duration.

| **Parameter** | **Glycemic Control** | **Disease Duration** |
| --- | --- | --- |
| **PFF** | -0.200 | 0.279 |
| **HFF** | **-0.818**** | -0.142 |
| **VFI** | **-0.557*** | -0.066 |
| **BMI** | -0.295 | -0.032 |

BMI, body mass index; FF, fat fraction; VFI, visceral fat index; HFF, hepatic fat fraction; PFF, pancreatic fat fraction.
