# Supplementary material for: Quantification of Ectopic Fat Fractions in Type 2 Diabetes Mellitus using MR-Dixon Technique
Source: Research Square preprint supplement (doi:10.21203/rs.3.rs-5656230/v1), 2025-05-06
Supplement: Supplementary file 6 [file 9d3ce00cc708a893c498d44c.docx]

**Table (7):** Comparison of Body Fat Composition Parameters by Diabetes type of Treatment.

| **Parameter** | **Treatment** | **Mean** | **Std. Deviation** | **Mann-Whitney U** | **p-value** |
| --- | --- | --- | --- | --- | --- |
| **VFI** | Oral | 0.4033 | 0.13186 | 26.500 | 0.953 |
| Insulin | 0.4000 | 0.12679 |  |  |
| **HFF** | Oral | 11.3667 | 10.08696 | 20.000 | 0.409 |
| Insulin | 6.6000 | 4.11005 |  |  |
| **PFF** | Oral | 12.3833 | 4.29438 | 23.000 | 0.632 |
| Insulin | 11.3111 | 2.98012 |  |  |
| **BMI** | Oral | 31.2600 | 6.34134 | 19.000 | 0.346 |
| Insulin | 28.5789 | 4.07097 |  |  |

BMI, body mass index; SAT, subcutaneous adipose tissue; FF, fat fraction; VFI, visceral fat index; HFF, hepatic fat fraction; PFF, pancreatic fat fraction.
