# Supplementary material for: Quantification of Ectopic Fat Fractions in Type 2 Diabetes Mellitus using MR-Dixon Technique
Source: Research Square preprint supplement (doi:10.21203/rs.3.rs-5656230/v1), 2025-05-06
Supplement: Supplementary file 7 [file ea76e39fddf170116aa4923d.docx]

**Table (2):** Association of Diabetes Mellitus and Various Health Risk Factors.

| **Parameter** | | **DM (%)** | **NDM (%)** | **p-value** |
| --- | --- | --- | --- | --- |
| **Gender** | Female | 5 (33.3%) | 6 (40.0%) | 0.705 |
| Male | 10 (66.7%) | 9 (60.0%) |
| **Smoking** | No | 13 (86.7%) | 11 (73.3%) | 0.361 |
| Yes | 2 (13.3%) | 4 (26.7%) |
| **Metabolic Syndrome** | Present | 12 (80.0%) | 2 (13.3%) | **0.000*** |
| Absent | 3 (20.0%) | 13 (86.7%) |
| **Hypertension** | No | 15 (100.0%) | 6 (40.0%) | **0.000*** |
| Yes | 0 (0.0%) | 9 (60.0%) |
| **Central Obesity** | No | 7 (46.7%) | 1 (6.7%) | **0.013*** |
| Yes | 8 (53.3%) | 14 (93.3%) |

DM: Diabetes mellitus group; and NDM: Non diabetes mellitus group. P-value shows comparison of the DM and NDM groups.
